# Supplementary material
Source: MDPI journal article supplement (https://www.mdpi.com/2071-1050/11/15/4003)
Supplement: s1 [file s1]

Archive with 2 entries (2 files):
- Supplementary material_2019-7-17/Supplementary file-1_2019-7-17.pdf
- Supplementary material_2019-7-17/Supplementary file-2.pdf
