# Supplementary material
Source: MDPI journal article supplement (https://www.mdpi.com/2071-1050/11/15/4003)
Supplement: s1 [file s1]

## Supplementary file 2

### Items exposed to flood in Garbey Kourou, Larba Birno, Tallé and Touré (Niger) according risk level

Flood assessment for risk-informed planning along the Sirba river, Niger

Maurizio Tiepolo, Maurizio Rosso, Giovanni Massazza, Elena Belcore, Suradji Issa and Sarah Braccio

Sustainability – Open Access Journal

Acronyms: E – East, N - North, RP – Return period.

## Garbey Kourou, fluvial flood

| RP<br>years | Code | Geographic coordinates |  | Lot | House<br>earth | House<br>concrete | Latrine | Hoven | Granary | Field<br>ha |
|-------------|------|------------------------|--|-----|----------------|-------------------|---------|-------|---------|-------------|
| 10          | 131  |                        |  |     |                |                   |         |       |         | 0,31        |
|             | 133  |                        |  |     |                |                   |         |       |         | 0,14        |
|             | 137  |                        |  |     |                |                   |         |       |         | 0,05        |
|             | 143  |                        |  |     |                |                   |         |       |         | 0,42        |
|             | 145  |                        |  |     |                |                   |         |       |         | 0,54        |
|             | 146  |                        |  |     |                |                   |         |       |         | 0,17        |
| 10          | SUM  |                        |  |     | 0              | 0                 | 0       | 0     | 0       | 1,63        |

[illegible]



## Supplementary file 2

Items exposed to flood in Garbey Kourou, Larba Birno, Tallé and Touré (Niger) according risk level

|     |     |  |  |   |    |   |   |   |   |      |
|-----|-----|--|--|---|----|---|---|---|---|------|
|     | 141 |  |  |   |    |   |   |   |   | 0,05 |
|     | 142 |  |  |   |    |   |   |   |   | 0,03 |
|     | 143 |  |  |   |    |   |   |   |   | 0,54 |
|     | 144 |  |  |   |    |   |   |   |   | 0,20 |
| 100 | SUM |  |  | 0 | 17 | 2 | 5 | 1 | 4 | 2,56 |

## Supplementary file 2

Items exposed to flood in Garbey Kourou, Larba Birno, Tallé and Touré (Niger) according risk level

## Larba Birno, fluvial flood

| RP<br>Years | Code | Geographic coordinates | Lot, # | House earth<br>bricks, # | Latrine or shower,<br># |   | Granary, # | Fields, ha |
|-------------|------|------------------------|--------|--------------------------|-------------------------|---|------------|------------|
| 10          | 1    |                        |        |                          |                         |   |            | 1,01       |
|             | 3    |                        |        |                          |                         |   |            | 0,04       |
|             | 4    |                        |        |                          |                         |   |            | 0,10       |
|             | 5    |                        |        |                          |                         |   |            | 0,75       |
|             | 6    |                        |        |                          |                         |   |            | 0,10       |
|             | 7    |                        |        |                          |                         |   |            | 0,64       |
|             | 8    |                        |        |                          |                         |   |            | 2,75       |
|             | 76   |                        |        |                          |                         |   |            | 0,02       |
|             | 77   |                        |        |                          |                         |   |            | 1,66       |
|             | 78   |                        |        |                          |                         |   |            | 0,10       |
|             | 79   |                        |        |                          |                         |   |            | 0,11       |
|             | 80   |                        |        |                          |                         |   |            | 1,40       |
|             | 81   |                        |        |                          |                         |   |            | 0,1        |
|             | 82   |                        |        |                          |                         |   |            | 0,02       |
|             | 83   |                        |        |                          |                         |   |            | 0,19       |
|             | 84   |                        |        |                          |                         |   |            | 0,26       |
|             | 85   |                        |        |                          |                         |   |            | 0,11       |
|             | 86   |                        |        |                          |                         |   |            | 0,10       |
|             | 87   |                        |        |                          |                         |   |            | 0,10       |
|             | 88   |                        |        |                          |                         |   |            | 0,25       |
|             | 89   |                        |        |                          |                         |   |            | 0,38       |
|             | 126  |                        |        |                          |                         |   |            | 0,12       |
| 10          | SUM  |                        |        | 0                        | 0                       | 0 | 0          | 10,31      |

| RP<br>years | Code | Geographic coordinates | Lot, # | House earth<br>bricks, # | Latrine, # | Photovoltaic<br>mini-plant, # | Granary, # | Field ha |
|-------------|------|------------------------|--------|--------------------------|------------|-------------------------------|------------|----------|
| 30          | 1    |                        |        |                          |            |                               |            | 0,10     |
|             | 2    |                        |        |                          |            |                               |            | 0,08     |
|             | 3    |                        |        |                          |            |                               |            | 0,89     |
|             | 5    |                        |        |                          |            |                               |            | 0,30     |
|             | 6    |                        |        |                          |            |                               |            | 0,30     |
|             | 8    |                        |        |                          |            |                               |            | 7,84     |
|             | 10   |                        |        |                          |            |                               |            | 8,30     |
|             | 11   |                        |        |                          |            |                               |            | 1,16     |
|             | 33   |                        |        | 1                        |            |                               |            |          |
|             | 40   |                        |        | 1                        | 1          |                               |            |          |
|             | 41   |                        |        | 1                        |            |                               |            |          |
|             | 91   |                        |        |                          |            | 1                             |            |          |
|             | 108  |                        |        |                          |            |                               |            | 0,11     |
|             | 109  |                        |        |                          |            |                               |            | 0,10     |

## Supplementary file 2

Items exposed to flood in Garbey Kourou, Larba Birno, Tallé and Touré (Niger) according risk level

|    |     |  |  |   |   |   |   |   |      |
|----|-----|--|--|---|---|---|---|---|------|
|    | 111 |  |  |   |   |   |   |   | 0,10 |
|    | 116 |  |  |   |   |   |   |   | 0,03 |
|    | 117 |  |  |   |   |   |   |   | 0,34 |
|    | 122 |  |  |   |   |   |   |   | 0,26 |
|    | 123 |  |  |   |   |   |   |   | 0,81 |
|    | 125 |  |  |   |   |   |   |   | 0,23 |
|    | 127 |  |  |   |   |   |   |   | 0,02 |
|    | 128 |  |  |   |   |   |   |   | 0,03 |
|    | 129 |  |  |   |   |   |   |   | 0,10 |
|    | 130 |  |  |   |   |   |   |   | 0,10 |
| 30 | SUM |  |  | 0 | 3 | 1 | 1 | 0 | 21,2 |

| RP<br>years | Code | Geographic<br>coordinates | Lot | House in<br>earth bricks, | Latrine, # | Photovoltaic<br>plant, # | Grannary, # | Field, # |
|-------------|------|---------------------------|-----|---------------------------|------------|--------------------------|-------------|----------|
| 100         | 1    |                           |     |                           |            |                          |             | 2,93     |
|             | 2    |                           |     |                           |            |                          |             | 0,25     |
|             | 5    |                           |     |                           |            |                          |             | 0,35     |
|             | 6    |                           |     |                           |            |                          |             | 0,38     |
|             | 7    |                           |     |                           |            |                          |             | 0,16     |
|             | 8    |                           |     |                           |            |                          |             | 0,10     |
|             | 9    |                           |     |                           |            |                          |             | 1,42     |
|             | 10   |                           |     |                           |            |                          |             | 2,10     |
|             | 12   |                           |     |                           |            |                          |             | 0,52     |
|             | 13   |                           |     |                           |            |                          |             | 0,25     |
|             | 21   |                           |     | 1                         | 1          |                          |             |          |
|             | 22   |                           |     | 1                         | 1          |                          |             |          |
|             | 23   |                           |     | 1                         | 1          |                          |             |          |
|             | 24   |                           |     | 1                         | 1          |                          |             |          |
|             | 25   |                           |     | 2                         | 1          |                          |             |          |
|             | 26   |                           |     | 1                         | 1          |                          |             |          |
|             | 27   |                           |     | 1                         |            |                          |             |          |
|             | 28   |                           |     | 1                         | 1          |                          |             |          |
|             | 29   |                           |     | 1                         | 1          |                          |             |          |
|             | 30   |                           |     | 1                         |            |                          |             |          |
|             | 31   |                           |     | 1                         | 1          |                          |             |          |
|             | 32   |                           |     | 1                         | 1          |                          |             |          |
|             | 34   |                           |     | 1                         |            |                          |             |          |
|             | 35   |                           |     | 1                         |            |                          |             |          |
|             | 36   |                           |     | 1                         |            |                          |             |          |
|             | 37   |                           |     | 1                         | 1          |                          |             |          |
|             | 38   |                           |     | 1                         |            |                          |             |          |
|             | 39   |                           |     | 1                         | 1          |                          |             |          |
|             | 40   |                           |     | 1                         | 1          |                          |             |          |
|             | 41   |                           |     | 1                         |            |                          |             |          |
|             | 42   |                           |     | 1                         |            |                          |             |          |
|             | 43   |                           |     | 1                         | 1          |                          |             |          |
|             | 44   |                           |     | 1                         | 1          |                          |             |          |
|             | 45   |                           |     | 1                         |            |                          |             |          |

## Supplementary file 2

Items exposed to flood in Garbey Kourou, Larba Birno, Tallé and Touré (Niger) according risk level

|     |     |  |  |   |    |    |   |   |       |
|-----|-----|--|--|---|----|----|---|---|-------|
|     | 46  |  |  |   | 1  |    |   |   |       |
|     | 47  |  |  |   | 1  |    |   |   |       |
|     | 48  |  |  |   | 1  | 1  |   |   |       |
|     | 49  |  |  |   | 1  | 1  |   |   |       |
|     | 50  |  |  |   | 1  | 1  |   |   |       |
|     | 51  |  |  |   | 1  | 1  |   |   |       |
|     | 52  |  |  |   | 1  | 1  |   |   |       |
|     | 53  |  |  |   | 1  | 1  |   |   |       |
|     | 54  |  |  |   | 1  | 1  |   |   |       |
|     | 55  |  |  |   | 1  |    |   |   |       |
|     | 56  |  |  |   | 1  |    |   |   |       |
|     | 90  |  |  |   | 1  | 1  |   |   |       |
|     | 91  |  |  |   |    |    | 1 |   |       |
|     | 92  |  |  |   | 1  |    |   |   |       |
|     | 93  |  |  |   | 1  |    |   |   |       |
|     | 94  |  |  |   | 1  |    |   |   |       |
|     | 95  |  |  |   | 1  | 1  |   |   |       |
|     | 107 |  |  |   |    |    |   |   | 0,16  |
|     | 110 |  |  |   |    |    |   |   | 0,10  |
|     | 112 |  |  |   |    |    |   |   | 0,10  |
|     | 113 |  |  |   |    |    |   |   | 0,10  |
|     | 114 |  |  |   |    |    |   |   | 0,03  |
|     | 115 |  |  |   |    |    |   |   | 0,11  |
|     | 118 |  |  |   |    |    |   |   | 0,11  |
|     | 119 |  |  |   |    |    |   |   | 0,10  |
|     | 120 |  |  |   |    |    |   |   | 0,15  |
|     | 121 |  |  |   |    |    |   |   | 0,75  |
|     | 124 |  |  |   |    |    |   |   | 0,85  |
|     | 131 |  |  |   |    |    |   |   | 0,11  |
| 100 | SUM |  |  | 0 | 41 | 24 | 1 | 0 | 11,13 |

## Larba Birno, pluvial flood

| RP<br>Years | Code | Coordonnées<br>géographiques | Concession | Maison<br>banco n. | Latrine |  | Grenier n. | Champ |
|-------------|------|------------------------------|------------|--------------------|---------|--|------------|-------|
| 100         | 57   |                              |            | 1                  |         |  |            |       |
|             | 58   |                              |            | 1                  | 1       |  |            |       |
|             | 59   |                              |            | 1                  |         |  |            |       |
|             | 60   |                              |            | 1                  |         |  |            |       |
|             | 61   |                              |            | 1                  | 1       |  |            |       |
|             | 62   |                              |            | 1                  | 1       |  |            |       |
|             | 63   |                              |            | 1                  | 1       |  |            |       |
|             | 65   |                              |            | 1                  | 1       |  |            |       |
|             | 66   |                              |            | 1                  | 1       |  |            |       |
|             | 67   |                              |            | 1                  | 1       |  |            |       |
|             | 68   |                              |            | 1                  | 1       |  |            |       |
|             | 69   |                              |            | 1                  | 1       |  |            |       |
|             | 70   |                              |            | 1                  | 1       |  |            |       |
|             | 71   |                              |            | 1                  | 1       |  |            |       |

## Supplementary file 2

Items exposed to flood in Garbey Kourou, Larba Birno, Tallé and Touré (Niger) according risk level

|     |     |  |  |   |    |    |   |   |
|-----|-----|--|--|---|----|----|---|---|
| 72  |     |  |  | 1 | 1  |    |   |   |
| 73  |     |  |  | 1 |    |    |   |   |
| 74  |     |  |  | 1 |    |    |   |   |
| 75  |     |  |  | 1 |    |    |   |   |
| 96  |     |  |  | 1 |    |    |   |   |
| 97  |     |  |  |   | 1  |    |   |   |
| 98  |     |  |  |   |    |    | 1 |   |
| 99  |     |  |  |   |    |    | 1 |   |
| 100 |     |  |  |   |    |    | 1 |   |
| 101 |     |  |  |   |    |    | 1 |   |
| 102 |     |  |  | 1 |    |    |   |   |
| 103 |     |  |  | 1 |    |    |   |   |
| 104 |     |  |  | 1 |    |    |   |   |
| 105 |     |  |  | 1 |    |    |   |   |
| 100 | SUM |  |  | 0 | 23 | 13 | 0 | 4 |

## Supplementary file 2

Items exposed to flood in Garbey Kourou, Larba Birno, Tallé and Touré (Niger) according risk level

## Tallé, fluvial flood

| RP<br>Years | Code | Geographic    | coordinates | House in earth<br>bricks, # | House in concrete<br>bricks, # | Latrine or<br>Shower, # | Granary, # | Blacksmith<br>workshop, # | Field, ha | Paddy field, ha |
|-------------|------|---------------|-------------|-----------------------------|--------------------------------|-------------------------|------------|---------------------------|-----------|-----------------|
| 10          | 12   |               |             |                             |                                |                         |            |                           | 2177      |                 |
|             | 25   |               |             |                             |                                |                         |            |                           | 3008      |                 |
|             | 34   |               |             |                             |                                |                         |            |                           | 1162      |                 |
|             | 44   | 13°45'40.9"N  | 1°37'49.4"E | 1                           |                                |                         |            |                           |           |                 |
|             | 49   | 13°45'36.2"N  | 1°37'47.1"E | 4                           |                                |                         |            |                           |           |                 |
|             | 43   | 13°45'42.0"N  | 1°37'50.2"E |                             |                                |                         | 1          |                           |           |                 |
|             | 49   | 13°45'36.2"N  | 1°37'47.1"E |                             |                                |                         | 2          |                           |           |                 |
|             | 12   | 13°45'50.0"N  | 1°37'53.5"E |                             |                                |                         |            |                           |           |                 |
|             | 25   | 13°45'9.0"N   | 1°37'52.2"E |                             |                                | 1                       |            |                           |           |                 |
|             | 34   | 13°45'46.7"N  | 1°37'52.2"E |                             |                                |                         |            |                           |           |                 |
|             | 74   | 13°46'18.6"N  | 1°38'41.2"E |                             |                                |                         |            |                           | 2159      |                 |
|             | 75   | 13°46'15.7"N  | 1°38'51.7"E |                             |                                |                         |            |                           | 1039      |                 |
|             | 76   | 13°46'15.7"N  | 1°38'51.4"E |                             |                                |                         |            |                           | 1328      |                 |
|             | 77   | 13°46'15.6"N  | 1°38'53.6"E |                             |                                |                         |            |                           | 1703      |                 |
|             | 79   | 13°46'01.2"N  | 1°38'03.3"E |                             |                                |                         |            |                           | 212       |                 |
|             | 80   | 13°46'00.9"N  | 1°38'05.2"E |                             |                                |                         |            |                           | 502       |                 |
|             | 82   | 13°46'01.2"N  | 1°38'03.3"E |                             |                                |                         |            |                           | 747       |                 |
|             | 85   | 13°46'02.2"N  | 1°38'05.9"E |                             |                                |                         |            |                           | 563       |                 |
|             | 86   | 13°46'03.0"N  | 1°38'07.8"E |                             |                                |                         |            |                           | 249       |                 |
|             | 87   | 13°46'04.2"N  | 1°38'07.8"E |                             |                                |                         |            |                           | 1516      |                 |
|             | 88   | 13°46'06.11"N | 1°38'10.3"E |                             |                                |                         |            |                           | 1982      |                 |
|             | 95   | 13°46'08.0"N  | 1°38'12.6"E |                             |                                |                         |            |                           | 1346      |                 |
|             | 96   | 13°46'08.8"N  | 1°38'18.5"E |                             |                                |                         |            |                           | 1404      |                 |
|             | 97   | 13°46'09.7"N  | 1°38'20.3"E |                             |                                |                         |            |                           | 1799      |                 |
|             | 98   | 13°46'11.7"N  | 1°38'22.2"E |                             |                                |                         |            |                           | 1353      |                 |
|             | 99   | 13°46'05.0"N  | 1°38'24.4"E |                             |                                |                         |            |                           | 449       |                 |
|             | 100  | 13°46'06.9"N  | 1°38'24.3"E |                             |                                |                         |            |                           | 3241      |                 |
|             | 101  | 13°46'08.5"N  | 1°38'24.8"E |                             |                                |                         |            |                           | 3750      |                 |
|             | 102  | 13°46'09.4"N  | 1°38'28.1"E |                             |                                |                         |            |                           | 1986      |                 |
|             | 103  | 13°46'12.5"N  | 1°38'58.1"E |                             |                                |                         |            |                           | 1737      |                 |
|             | 104  | 13°46'13.0"N  | 1°38'56.9"E |                             |                                |                         |            |                           | 1018      |                 |
|             | 105  | 13°46'13.0"N  | 1°38'56.9"E |                             |                                |                         |            |                           | 764       |                 |
|             | 106  | 13°46'14.9"N  | 1°38'56.6"E |                             |                                |                         |            |                           | 779       |                 |
|             | 107  | 13°46'15.4"N  | 1°38'55.2"E |                             |                                |                         |            |                           |           |                 |
|             | 108  | 13°46'14.4"N  | 1°39'07.4"E |                             |                                |                         |            |                           | 2142      |                 |
|             | 109  | 13°46'14.1"N  | 1°39'06.0"E |                             |                                |                         |            |                           | 540       |                 |
|             | 110  | 13°46'12.5"N  | 1°39'05.1"E |                             |                                |                         |            |                           | 2609      |                 |
|             | 111  | 13°46'14.9"N  | 1°39'01.9"E |                             |                                |                         |            |                           | 1842      |                 |
|             | 112  | 13°46'16.3"N  | 1°38'46.0"E |                             |                                |                         |            |                           | 1092      |                 |
|             | 113  | 13°46'16.6"N  | 1°39'20.9"E |                             |                                |                         |            |                           | 1918      |                 |
|             | 114  | 13°46'16.3"N  | 1°39'19.7"E |                             |                                |                         |            |                           | 3198      |                 |
|             | 115  | 13°46'15.3"N  | 1°39'17.0"E |                             |                                |                         |            |                           | 3030      |                 |
|             | 116  | 13°46'14.6"N  | 1°39'14.4"E |                             |                                |                         |            |                           | 1425      |                 |



## Supplementary file 2

Items exposed to flood in Garbey Kourou, Larba Birno, Tallé and Touré (Niger) according risk level

|    |     |               |              |   |   |  |   |   |       |   |
|----|-----|---------------|--------------|---|---|--|---|---|-------|---|
|    | 117 | 13°46'14.1''N | 1°39'12.9''E |   |   |  |   |   | 3170  |   |
|    | 118 | 13°46'16.6''N | 1°39'20.9''E |   |   |  |   |   | 2720  |   |
|    | 119 | 13°46'18.4''N | 1°39'22.6''E |   |   |  |   |   | 1131  |   |
|    | 120 | 13°46'17.7''N | 1°39'24.0''E |   |   |  |   |   | 1665  |   |
|    | 121 | 13°46'18.3''N | 1°39'25.4''E |   |   |  |   |   | 1551  |   |
|    | 122 | 13°46'20.0''N | 1°39'25.7''E |   |   |  |   |   | 1208  |   |
|    | 123 | 13°46'19.1''N | 1°39'27.4''E |   |   |  |   |   | 2271  |   |
|    | 124 | 13°46'21.3''N | 1°39'28.3''E |   |   |  |   |   | 1206  |   |
|    | 125 | 13°46'20.7''N | 1°39'30.1''E |   |   |  |   |   | 886   |   |
|    | 126 | 13°46'22.1''N | 1°39'30.3''E |   |   |  |   |   | 875   |   |
|    | 127 | 13°46'22.4''N | 1°39'31.0''E |   |   |  |   |   | 1536  |   |
|    | 130 | 13°46'23.9''N | 1°39'35.4''E |   |   |  |   |   |       | 1 |
|    | 132 |               |              |   |   |  |   |   | 317   |   |
|    | 133 |               |              |   |   |  |   |   | 228   |   |
|    | 135 |               |              |   |   |  |   |   | 292   |   |
|    | 136 |               |              |   |   |  |   |   | 165   |   |
|    | 137 |               |              |   |   |  |   |   | 186   |   |
|    | 139 |               |              |   |   |  |   |   | 211   |   |
|    | 140 |               |              |   |   |  |   |   | 808   |   |
|    | 142 |               |              |   |   |  |   |   | 37    |   |
|    | 157 |               |              |   |   |  |   |   | 300   |   |
|    | 158 |               |              |   |   |  |   |   | 800   |   |
|    | 159 |               |              |   |   |  |   |   | 1300  |   |
|    | 160 |               |              |   |   |  |   |   | 1000  |   |
|    | 161 |               |              |   |   |  |   |   | 1500  |   |
|    | 162 |               |              |   |   |  |   |   | 7800  |   |
|    | 163 |               |              |   |   |  |   |   | 3500  |   |
|    | 164 |               |              |   |   |  |   |   | 200   |   |
|    | 165 |               |              |   |   |  |   |   | 2800  |   |
|    | 166 |               |              |   |   |  |   |   | 1100  |   |
|    | 167 |               |              |   |   |  |   |   | 5000  |   |
|    | 170 |               |              |   |   |  |   |   | 2400  |   |
|    | 171 |               |              |   |   |  |   |   | 1000  |   |
|    | 172 |               |              |   |   |  |   |   | 1000  |   |
|    | 173 |               |              |   |   |  |   |   | 1900  |   |
| 10 | SUM |               |              | 6 | 0 |  | 3 | 0 | 87556 | 1 |

| RP<br>Years | Code | Coordonnées géographiques |              | Houses<br>in earth bricks | Houses in<br>cement bricks |  | Granary, # | Blacksmith<br>workshop, # | Field, m <sup>2</sup> | Paddy field, m <sup>2</sup> |
|-------------|------|---------------------------|--------------|---------------------------|----------------------------|--|------------|---------------------------|-----------------------|-----------------------------|
| 30          | 12   |                           |              |                           |                            |  |            |                           | 815                   |                             |
|             | 25   |                           |              |                           |                            |  |            |                           | 2625                  |                             |
|             | 26   | 13°45'48.8''N             | 1°37'52.1''E | 1                         |                            |  |            |                           |                       |                             |
|             | 28   | 13°45'48.1''N             | 1°37'51.8''E | 1                         |                            |  |            |                           |                       |                             |
|             | 29   | 13°45'47.8''N             | 1°37'51.9''E | 1                         |                            |  |            |                           |                       |                             |
|             | 34   |                           |              |                           |                            |  |            |                           | 159                   |                             |
|             | 58   | 13°45'32.1''N             | 1°37'44.3''E | 1                         |                            |  |            |                           |                       |                             |
|             | 59   | 13°45'32.3''N             | 1°37'44.6''E | 1                         |                            |  |            |                           |                       |                             |

## Supplementary file 2

### Items exposed to flood in Garbey Kourou, Larba Birno, Tallé and Touré (Niger) according risk level

|     |               |              |  |  |  |   |  |      |
|-----|---------------|--------------|--|--|--|---|--|------|
| 62  | 13°45'31.0''N | 1°37'44.0''E |  |  |  | 1 |  |      |
| 74  |               |              |  |  |  |   |  | 1207 |
| 75  |               |              |  |  |  |   |  | 879  |
| 76  |               |              |  |  |  |   |  | 52   |
| 77  |               |              |  |  |  |   |  | 1974 |
| 79  |               |              |  |  |  |   |  | 311  |
| 80  |               |              |  |  |  |   |  | 700  |
| 85  |               |              |  |  |  |   |  | 645  |
| 86  |               |              |  |  |  |   |  | 291  |
| 87  |               |              |  |  |  |   |  | 229  |
| 88  |               |              |  |  |  |   |  | 498  |
| 89  |               |              |  |  |  |   |  | 278  |
| 90  |               |              |  |  |  |   |  | 103  |
| 91  |               |              |  |  |  |   |  | 240  |
| 93  |               |              |  |  |  |   |  | 9    |
| 94  |               |              |  |  |  |   |  | 490  |
| 95  |               |              |  |  |  |   |  | 680  |
| 96  |               |              |  |  |  |   |  | 60   |
| 97  |               |              |  |  |  |   |  | 3551 |
| 99  |               |              |  |  |  |   |  | 1678 |
| 100 |               |              |  |  |  |   |  | 3277 |
| 102 |               |              |  |  |  |   |  | 2735 |
| 103 |               |              |  |  |  |   |  | 566  |
| 104 |               |              |  |  |  |   |  | 459  |
| 105 |               |              |  |  |  |   |  | 801  |
| 106 |               |              |  |  |  |   |  | 1302 |
| 107 |               |              |  |  |  |   |  | 1853 |
| 108 |               |              |  |  |  |   |  | 633  |
| 109 |               |              |  |  |  |   |  | 246  |
| 110 |               |              |  |  |  |   |  | 438  |
| 111 |               |              |  |  |  |   |  | 821  |
| 112 |               |              |  |  |  |   |  | 1042 |
| 113 |               |              |  |  |  |   |  | 69   |
| 114 |               |              |  |  |  |   |  | 757  |
| 115 |               |              |  |  |  |   |  | 300  |
| 117 |               |              |  |  |  |   |  | 595  |
| 120 |               |              |  |  |  |   |  | 195  |
| 121 |               |              |  |  |  |   |  | 329  |
| 122 |               |              |  |  |  |   |  | 168  |
| 123 |               |              |  |  |  |   |  | 413  |
| 124 |               |              |  |  |  |   |  | 315  |
| 125 |               |              |  |  |  |   |  | 88   |
| 129 |               |              |  |  |  |   |  | 288  |
| 131 |               |              |  |  |  |   |  | 477  |
| 132 |               |              |  |  |  |   |  | 1026 |
| 133 |               |              |  |  |  |   |  | 454  |
| 135 |               |              |  |  |  |   |  | 1273 |
| 136 |               |              |  |  |  |   |  | 647  |
| 137 |               |              |  |  |  |   |  | 634  |
| 138 |               |              |  |  |  |   |  | 86   |
| 139 |               |              |  |  |  |   |  | 1022 |

## Supplementary file 2

Items exposed to flood in Garbey Kourou, Larba Birno, Tallé and Touré (Niger) according risk level

|    |     |  |  |   |   |  |   |   |       |     |
|----|-----|--|--|---|---|--|---|---|-------|-----|
|    | 140 |  |  |   |   |  |   |   | 808   |     |
|    | 142 |  |  |   |   |  |   |   | 538   |     |
|    | 162 |  |  |   |   |  |   |   | 1000  |     |
|    | 165 |  |  |   |   |  |   |   | 2000  |     |
|    | 167 |  |  |   |   |  |   |   | 1800  |     |
|    | 171 |  |  |   |   |  |   |   | 2300  |     |
|    | 172 |  |  |   |   |  |   |   | 1600  |     |
|    | 173 |  |  |   |   |  |   |   | 4700  |     |
| 30 | SUM |  |  | 5 | 0 |  | 1 | 0 | 55692 | ... |

## Tallé, fluvial backwater

| RP<br>Years | Code | Geographic<br>coordinates | House<br>In earth brics | House in<br>ciment bricks | Latrine,<br>Shower, # | Granary, # | Blacksmith<br>workshop, # | Garden m <sup>2</sup> | Paddy field m <sup>2</sup> |
|-------------|------|---------------------------|-------------------------|---------------------------|-----------------------|------------|---------------------------|-----------------------|----------------------------|
| 64          | 12   |                           |                         |                           |                       |            |                           | 1289                  |                            |
|             | 25   |                           |                         |                           |                       |            |                           | 1231                  |                            |
|             | 34   |                           |                         |                           |                       |            |                           | 631                   |                            |
|             | 74   |                           |                         |                           |                       |            |                           | 1568                  |                            |
|             | 75   |                           |                         |                           |                       |            |                           | 792                   |                            |
|             | 76   |                           |                         |                           |                       |            |                           | 1208                  |                            |
|             | 77   |                           |                         |                           |                       |            |                           | 1406                  |                            |
|             | 79   |                           |                         |                           |                       |            |                           | 62                    |                            |
|             | 82   |                           |                         |                           |                       |            |                           | 769                   |                            |
|             | 85   |                           |                         |                           |                       |            |                           | 523                   |                            |
|             | 86   |                           |                         |                           |                       |            |                           | 399                   |                            |
|             | 87   |                           |                         |                           |                       |            |                           | 1666                  |                            |
|             | 88   |                           |                         |                           |                       |            |                           | 1928                  |                            |
|             | 89   |                           |                         |                           |                       |            |                           | 116                   |                            |
|             | 95   |                           |                         |                           |                       |            |                           | 1594                  |                            |
|             | 96   |                           |                         |                           |                       |            |                           | 1483                  |                            |
|             | 97   |                           |                         |                           |                       |            |                           | 1332                  |                            |
|             | 99   |                           |                         |                           |                       |            |                           | 218                   |                            |
|             | 100  |                           |                         |                           |                       |            |                           | 2257                  |                            |
|             | 101  |                           |                         |                           |                       |            |                           | 3750                  |                            |
|             | 102  |                           |                         |                           |                       |            |                           | 913                   |                            |
|             | 103  |                           |                         |                           |                       |            |                           | 1519                  |                            |
|             | 104  |                           |                         |                           |                       |            |                           | 914                   |                            |
|             | 105  |                           |                         |                           |                       |            |                           | 655                   |                            |
|             | 106  |                           |                         |                           |                       |            |                           | 641                   |                            |
|             | 108  |                           |                         |                           |                       |            |                           | 2030                  |                            |
|             | 109  |                           |                         |                           |                       |            |                           | 469                   |                            |
|             | 110  |                           |                         |                           |                       |            |                           | 2492                  |                            |
|             | 111  |                           |                         |                           |                       |            |                           | 1628                  |                            |
|             | 112  |                           |                         |                           |                       |            |                           | 871                   |                            |
|             | 113  |                           |                         |                           |                       |            |                           | 1907                  |                            |
|             | 114  |                           |                         |                           |                       |            |                           | 3152                  |                            |
|             | 115  |                           |                         |                           |                       |            |                           | 3083                  |                            |
|             | 116  |                           |                         |                           |                       |            |                           | 1411                  |                            |
|             | 117  |                           |                         |                           |                       |            |                           | 3280                  |                            |

## Supplementary file 2

Items exposed to flood in Garbey Kourou, Larba Birno, Tallé and Touré (Niger) according risk level

|     |     |  |  |  |  |  |  |        |       |
|-----|-----|--|--|--|--|--|--|--------|-------|
| 118 |     |  |  |  |  |  |  | 2720   |       |
| 119 |     |  |  |  |  |  |  | 1145   |       |
| 120 |     |  |  |  |  |  |  | 1779   |       |
| 121 |     |  |  |  |  |  |  | 1694   |       |
| 122 |     |  |  |  |  |  |  | 1249   |       |
| 123 |     |  |  |  |  |  |  | 2396   |       |
| 124 |     |  |  |  |  |  |  | 1508   |       |
| 125 |     |  |  |  |  |  |  | 989    |       |
| 126 |     |  |  |  |  |  |  | 875    |       |
| 127 |     |  |  |  |  |  |  | 1548   |       |
| 128 |     |  |  |  |  |  |  | 1921   |       |
| 130 |     |  |  |  |  |  |  |        | 55637 |
| 131 |     |  |  |  |  |  |  | 1786   |       |
| 133 |     |  |  |  |  |  |  | 143    |       |
| 135 |     |  |  |  |  |  |  | 44     |       |
| 136 |     |  |  |  |  |  |  | 28     |       |
| 137 |     |  |  |  |  |  |  | 49     |       |
| 139 |     |  |  |  |  |  |  | 41     |       |
| 64  | SUM |  |  |  |  |  |  | 126574 | 55637 |

## Tallé, fluvial flood

| RP<br>Years | Code | Geographic coordinates |              | House in earth<br>bricks, # | House in ciment<br>bricks, # | Latrine, shower, # | Granary, # | Blacksmith<br>workshop, # | Field m <sup>2</sup> | Paddy field m <sup>2</sup> |
|-------------|------|------------------------|--------------|-----------------------------|------------------------------|--------------------|------------|---------------------------|----------------------|----------------------------|
| 100         | 5    | 13°45'56.0''N          | 1°37'57.7''E | 1                           | 1                            |                    |            |                           |                      |                            |
|             | 8    | 13°45'55.1''N          | 1°37'56.5''E | 1                           | 1                            |                    |            |                           |                      |                            |
|             | 22   | 13°45'50.2''N          | 1°37'51.9''E | 1                           |                              |                    |            |                           |                      |                            |
|             | 25   |                        |              |                             |                              |                    |            |                           | 5019                 |                            |
|             | 31   | 13°45'47.7''N          | 1°37'51.5''E | 1                           |                              |                    |            |                           |                      |                            |
|             | 40   | 13°45'46.2''N          | 1°37'50.6''E | 4                           |                              |                    |            |                           |                      |                            |
|             | 41   | 1°37'50.0''E           | 1°37'49.8''E | 1                           |                              |                    |            |                           |                      |                            |
|             | 42   | 13°45'44.2''N          | 1°37'49.9''E | 1                           |                              |                    |            |                           |                      |                            |
|             | 46   | 13°45'39.2''N          | 1°37'48.0''E | 1                           |                              |                    |            |                           |                      |                            |
|             | 47   | 13°45'39.0''N          | 1°37'47.6''E | 1                           |                              |                    |            |                           |                      |                            |
|             | 48   | 13°45'37.4''N          | 1°37'47.2''E | 2                           |                              |                    |            |                           |                      |                            |
|             | 52   | 13°45'36.0''N          | 1°37'45.5''E | 1                           |                              |                    |            |                           |                      |                            |
|             | 53   | 13°45'35.5''N          | 1°37'45.1''E | 1                           |                              |                    |            |                           |                      |                            |
|             | 56   | 13°45'33.3''N          | 1°37'44.1''E | 1                           |                              |                    |            |                           |                      |                            |
|             | 58   | 13°45'32.1''N          | 1°37'44.3''E | 1                           |                              |                    |            |                           |                      |                            |
|             | 60B  | 13°45'31.8''N          | 1°37'43.3''E | 1                           |                              |                    |            |                           |                      |                            |
|             | 61   | 13°45'31.1''N          | 1°37'43.6''E | 1                           |                              |                    |            |                           |                      |                            |
|             | 63   | 13°45'30.9''N          | 1°37'43.8''E | 1                           |                              |                    |            |                           |                      |                            |
|             | 66   | 13°45'24.1''N          | 1°37'39.6''E | 1                           |                              |                    |            |                           |                      |                            |
|             | 67   | 13°45'24.7''N          | 1°37'40.1''E | 1                           |                              |                    |            |                           |                      |                            |
|             | 68   | 13°45'26.8''N          | 1°37'41.0''E | 1                           |                              |                    |            |                           |                      |                            |
|             | 9    | 13°45'55.0''N          | 1°37'56.5''E |                             |                              |                    | 1          |                           |                      |                            |
|             | 15   | 13°45'52.7''N          | 1°37'53.2''E |                             |                              |                    | 1          |                           |                      |                            |

## Supplementary file 2

Items exposed to flood in Garbey Kourou, Larba Birno, Tallé and Touré (Niger) according risk level

|     |               |              |    |   |   |   |   |       |     |
|-----|---------------|--------------|----|---|---|---|---|-------|-----|
| 30  | 13°45'47.4''N | 1°37'51.6''E |    |   |   | 2 |   |       |     |
| 39  | 13°45'46.5''N | 1°37'50.4''E |    |   |   | 1 |   |       |     |
| 48  | 13°45'37.4''N | 1°37'47.2''E |    |   |   | 1 |   |       |     |
| 57  | 13°45'32.5''N | 1°37'43.9''E |    |   |   | 1 |   |       |     |
| 65  | 13°45'24.0''N | 1°37'39.6''E |    |   |   | 1 |   |       |     |
| 60  | 13°45'31.6''N | 1°37'43.7''E |    |   |   |   | 1 |       |     |
| 25  | 13°45'9.0''N  | 1°37'52.2''E |    |   | 1 |   |   |       |     |
| 74  | 13°46'18.6''N | 1°38'41.2''E |    |   |   |   |   | 701   |     |
| 79  | 13°46'01.2''N | 1°38'03.3''E |    |   |   |   |   | 213   |     |
| 80  | 13°46'00.9''N | 1°38'05.2''E |    |   |   |   |   | 311   |     |
| 84  | 13°46'01.9''N | 1°38'03.7''E |    |   |   |   |   |       |     |
| 85  |               |              |    |   |   |   |   | 47    |     |
| 86  |               |              |    |   |   |   |   | 11    |     |
| 90  | 13°46'06.7''N | 1°38'09.6''E |    |   |   |   |   | 759   |     |
| 91  | 13°46'08.4''N | 1°38'09.7''E |    |   |   |   |   | 3978  |     |
| 92  | 13°46'10.0''N | 1°38'15.1''E |    |   |   |   |   | 370   |     |
| 93  | 13°46'10.0''N | 1°38'15.1''E |    |   |   |   |   | 609   |     |
| 94  | 13°46'08.7''N | 1°38'13.8''E |    |   |   |   |   | 112   |     |
| 99  |               |              |    |   |   |   |   | 2572  |     |
| 100 |               |              |    |   |   |   |   | 1157  |     |
| 102 |               |              |    |   |   |   |   | 2236  |     |
| 107 | 13°46'15.4''N | 1°38'55.2''E |    |   |   |   |   | 874   |     |
| 108 | 13°46'14.4''N | 1°39'07.4''E |    |   |   |   |   | 413   |     |
| 109 | 13°46'14.1''N | 1°39'06.0''E |    |   |   |   |   | 135   |     |
| 110 | 13°46'12.5''N | 1°39'05.1''E |    |   |   |   |   | 317   |     |
| 111 | 13°46'14.9''N | 1°39'01.9''E |    |   |   |   |   | 601   |     |
| 114 |               |              |    |   |   |   |   | 165   |     |
| 123 |               |              |    |   |   |   |   | 23    |     |
| 129 | 13°46'22.4''N | 1°39'30.6''E |    |   |   |   |   | 307   |     |
| 130 | 13°46'23.9''N | 1°39'35.4''E |    |   |   |   |   |       | 573 |
| 132 |               |              |    |   |   |   |   | 32    |     |
| 135 |               |              |    |   |   |   |   | 2425  |     |
| 136 |               |              |    |   |   |   |   | 349   |     |
| 137 |               |              |    |   |   |   |   | 1683  |     |
| 138 |               |              |    |   |   |   |   | 1778  |     |
| 139 |               |              |    |   |   |   |   | 2704  |     |
| 140 |               |              |    |   |   |   |   | 3564  |     |
| 142 |               |              |    |   |   |   |   | 2243  |     |
| 165 |               |              |    |   |   |   |   | 1500  |     |
| 167 |               |              |    |   |   |   |   | 4600  |     |
| 100 | SUM           |              | 24 | 0 |   | 7 | 1 | 42381 | 1   |

## Supplementary file 2

Items exposed to flood in Garbey Kourou, Larba Birno, Tallé and Touré (Niger) according risk level

## Touré, fluvial flood

| RP Years | Code | Geographic coordinates |  | Lot | House in earth bricks, # | House in ciment bricks, # | Latrine, shower# | Granary, # | Borehole, # | Wells, # | Field, ha |
|----------|------|------------------------|--|-----|--------------------------|---------------------------|------------------|------------|-------------|----------|-----------|
| 10       | 2    |                        |  |     |                          |                           |                  |            |             | 1        |           |
|          | 77   |                        |  |     |                          |                           |                  |            |             |          | 0,40      |
|          | 79   |                        |  |     |                          |                           |                  |            |             |          | 0,40      |
|          | 80   |                        |  |     |                          |                           |                  |            |             |          | 0,83      |
|          | 81   |                        |  |     |                          |                           |                  |            |             |          | 0,63      |
| 10       | SUM  |                        |  | 0   | 0                        | 0                         | 0                | 0          | 0           | 1        | 2,26      |

| RP Years | Code | Coordonnées géographiques |  | Lot | House in earth bricks, # | House in ciment bricks, # | Latrine, # | Granary, # | Borehole, # | Wells, # | Field, m <sup>2</sup> |
|----------|------|---------------------------|--|-----|--------------------------|---------------------------|------------|------------|-------------|----------|-----------------------|
| 30       | 1    |                           |  |     |                          |                           |            |            | 1           |          |                       |
|          | 15   |                           |  |     | 1                        |                           | 1          |            |             |          |                       |
|          | 59   |                           |  |     | 2                        |                           | 2          |            |             |          |                       |
|          | 72   |                           |  |     |                          |                           |            |            |             |          | 0,02                  |
|          | 73   |                           |  |     |                          |                           |            |            |             |          | 0,05                  |
|          | 79   |                           |  |     |                          |                           |            |            |             |          | 0,92                  |
|          | 83   |                           |  |     |                          |                           |            |            |             |          | 0,09                  |
|          | 131  |                           |  |     |                          | 1                         |            |            |             |          |                       |
|          | 151  |                           |  |     |                          |                           | 1          |            |             |          |                       |
| 30       | SUM  |                           |  | 0   | 3                        |                           | 4          |            | 1           | 0        | 1,08                  |

| RP Years | Code | Geographic coordinates |  | Lot, # | House in earth bricks, # | Latrine, # | Granary, # | Borehole, # | Wells, # | Field, ha |
|----------|------|------------------------|--|--------|--------------------------|------------|------------|-------------|----------|-----------|
| 100      | 7    |                        |  |        | 1                        |            |            |             |          |           |
|          | 8    |                        |  |        | 2                        |            |            |             |          |           |
|          | 9    |                        |  |        | 1                        | 1          |            |             |          |           |
|          | 10   |                        |  |        | 1                        |            |            |             |          |           |
|          | 11   |                        |  |        | 1                        |            |            |             |          |           |
|          | 12   |                        |  |        | 1                        |            |            |             |          |           |
|          | 13   |                        |  |        | 1                        |            |            |             |          |           |
|          | 14   |                        |  |        | 1                        |            |            |             |          |           |
|          | 16   |                        |  |        | 1                        | 1          |            |             |          |           |
|          | 17   |                        |  |        | 1                        | 1          |            |             |          |           |
|          | 18   |                        |  |        | 1                        | 1          |            |             |          |           |
|          | 19   |                        |  |        | 1                        |            |            |             |          |           |
|          | 20   |                        |  |        | 1                        |            |            |             |          |           |
|          | 21   |                        |  |        | 1                        |            |            |             |          |           |
|          | 22   |                        |  |        | 1                        |            |            |             |          |           |







## Supplementary file 2

Items exposed to flood in Garbey Kourou, Larba Birno, Tallé and Touré (Niger) according risk level

|     |     |  |  |   |    |    |    |   |   |      |
|-----|-----|--|--|---|----|----|----|---|---|------|
|     |     |  |  |   |    |    |    |   |   |      |
|     |     |  |  |   |    |    |    |   |   |      |
| 100 | SUM |  |  | 0 | 79 | 40 | 28 | 0 | 0 | 1,90 |

## Supplementary file 2

Items exposed to flood in Garbey Kourou, Larba Birno, Tallé and Touré (Niger) according risk level

## Touré, pluvial flood

| PdR<br>ans | Code | Coordonnées | géographiques | Concession | Maison<br>banco n. | Maison dur<br>n. | Latrine   | Cuisine  | Grenier n. | Atelier<br>forgeron n. | Champ    |
|------------|------|-------------|---------------|------------|--------------------|------------------|-----------|----------|------------|------------------------|----------|
| 100        | 98   |             |               |            | 1                  |                  | 1         |          |            |                        |          |
|            | 99   |             |               |            | 1                  |                  | 2         |          |            |                        |          |
|            | 100  |             |               |            | 1                  |                  |           |          |            |                        |          |
|            | 101  |             |               |            | 1                  |                  |           |          |            |                        |          |
|            | 102  |             |               |            | 1                  |                  |           |          |            |                        |          |
|            | 103  |             |               |            | 1                  |                  |           |          |            |                        |          |
|            | 104  |             |               |            | 1                  |                  | 1         |          |            |                        |          |
|            | 105  |             |               |            | 1                  |                  |           |          |            |                        |          |
|            | 106  |             |               |            | 1                  |                  | 1         |          |            |                        |          |
|            | 107  |             |               |            | 1                  |                  |           |          |            |                        |          |
|            | 108  |             |               |            | 1                  |                  | 1         |          |            |                        |          |
|            | 109  |             |               |            | 1                  |                  | 1         |          |            |                        |          |
|            | 110  |             |               |            | 1                  |                  | 1         |          |            |                        |          |
|            | 111  |             |               |            | 1                  |                  | 1         |          |            |                        |          |
|            | 112  |             |               |            | 1                  |                  |           |          |            |                        |          |
|            | 113  |             |               |            | 1                  |                  |           |          |            |                        |          |
|            | 114  |             |               |            | 1                  |                  |           |          |            |                        |          |
|            | 115  |             |               |            | 1                  |                  | 1         |          |            |                        |          |
|            | 116  |             |               |            | 1                  |                  |           |          |            |                        |          |
|            | 117  |             |               |            | 1                  |                  |           |          |            |                        |          |
|            | 118  |             |               |            | 1                  |                  | 1         |          |            |                        |          |
|            | 119  |             |               |            | 1                  |                  |           |          |            |                        |          |
|            | 152  |             |               |            |                    |                  |           |          | 1          |                        |          |
|            | 153  |             |               |            | 1                  |                  | 1         |          |            |                        |          |
|            | 154  |             |               |            |                    |                  | 1         |          |            |                        |          |
|            | 155  |             |               |            | 2                  |                  |           |          |            |                        |          |
|            | 156  |             |               |            | 1                  |                  | 1         |          |            |                        |          |
|            | 157  |             |               |            |                    |                  |           |          | 1          |                        |          |
|            | 158  |             |               |            | 1                  |                  | 1         |          |            |                        |          |
|            | 159  |             |               |            | 1                  |                  | 1         |          |            |                        |          |
|            | 160  |             |               |            |                    |                  | 1         |          |            |                        |          |
|            | 161  |             |               |            |                    |                  | 1         |          | 1          |                        |          |
|            | 162  |             |               |            |                    |                  |           |          | 1          |                        |          |
| <b>100</b> |      |             |               | <b>0</b>   | <b>28</b>          | <b>0</b>         | <b>18</b> | <b>0</b> | <b>4</b>   | <b>0</b>               | <b>0</b> |
