# Supplementary material
Source: MDPI journal article supplement (https://www.mdpi.com/2071-1050/11/15/4003)
Supplement: s1 [file s1]

# Supplementary file 1

## Methodology for detection of temporary surface water bodies in Niger using high-resolution imagery

Flood assessment for risk-informed planning along the Sirba river, Niger  
Maurizio Tiepolo, Maurizio Rosso, Giovanni Massazza, Elena Belcore, Suradji Issa and Sarah Braccio  
*Sustainability - Open Access Journal*

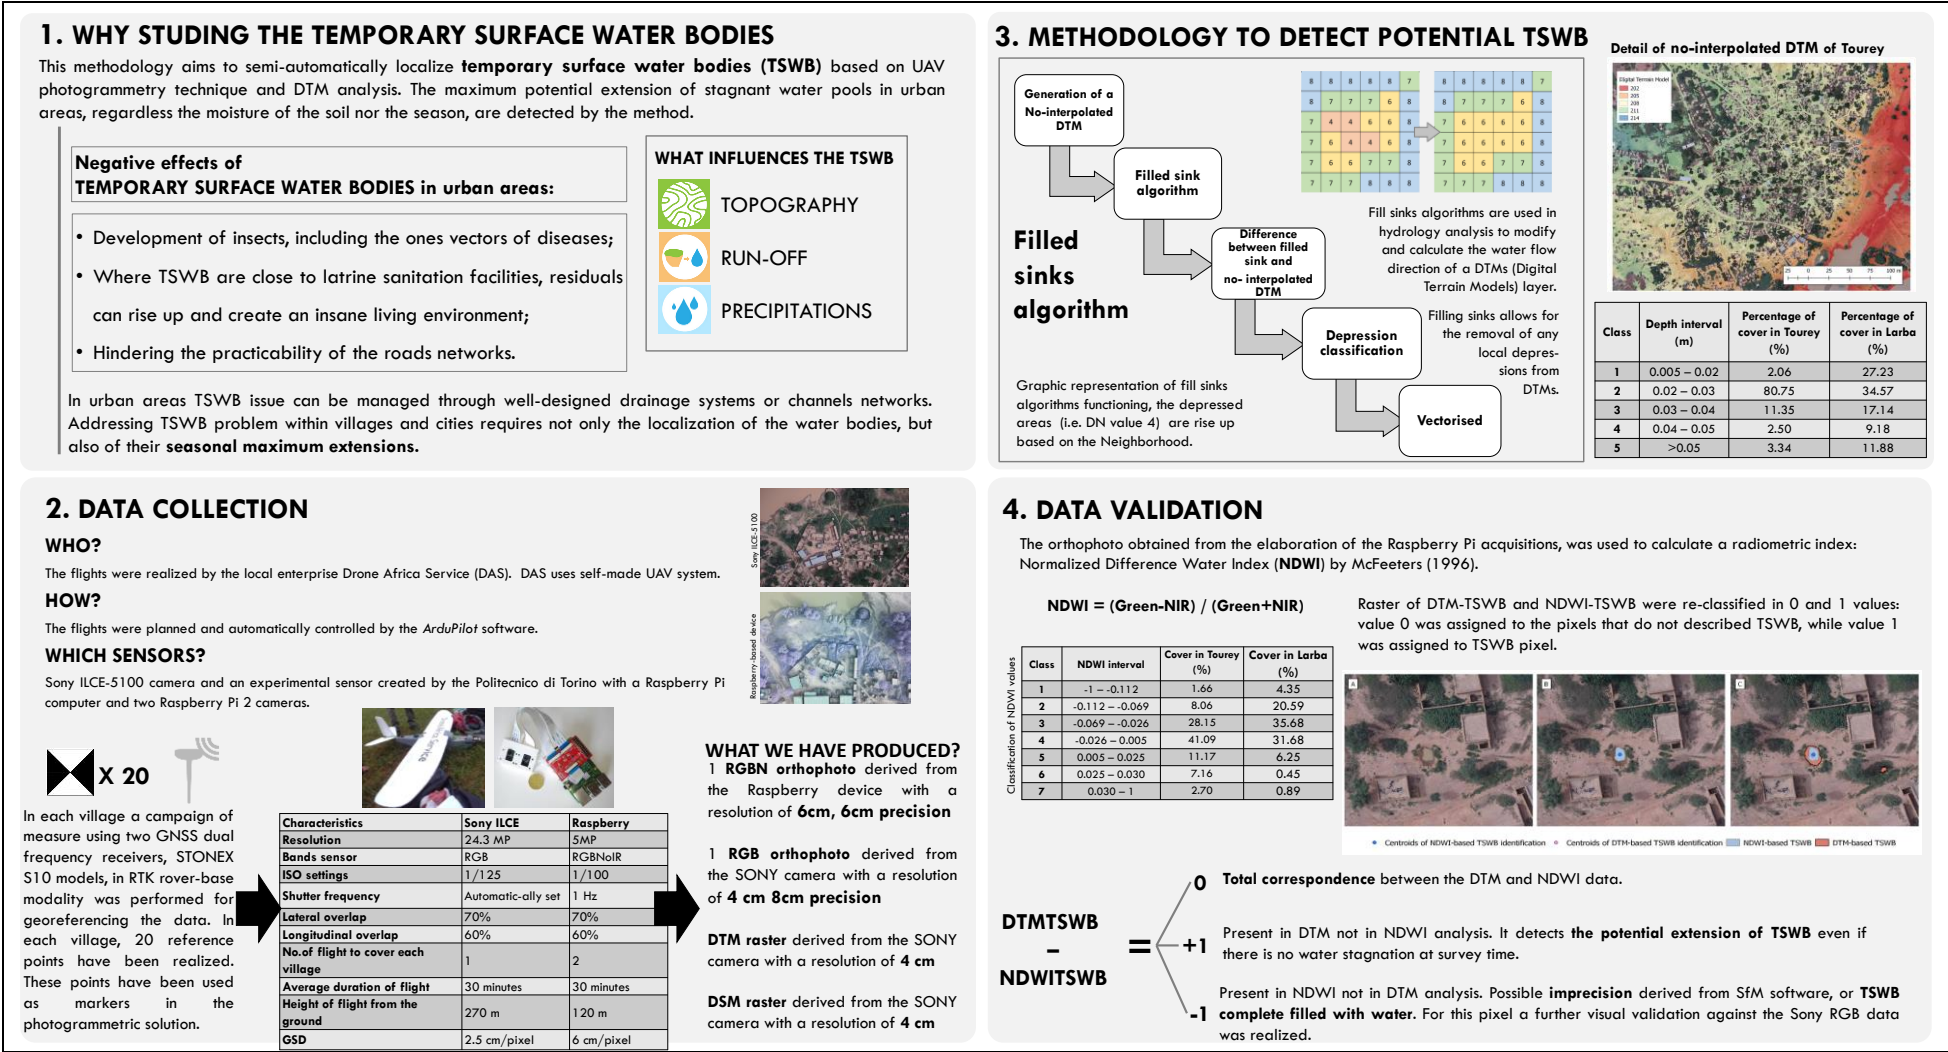

Taken from "E.Belcore, M.Piras, A.Pezzoli, G.Massazza, M.Rosso, 2019, Detection of temporary surface water bodies in Niger using high resolution imagery. Abstracts of European Geosciences Union (EGU) General Assembly, 7 - 12 Apr 2019, Vienna, Austria. Geophysical Research Abstracts Vol. 21, EGU2019-19068, 2019EGU General Assembly 2019".
